# Supplementary material for: Minocycline alleviates LPS-induced cognitive dysfunction in mice by inhibiting the NLRP3/caspase-1 pathway
Source: Aging (Albany NY). 2024 Feb 6;16(3):2989–3006. doi: 10.18632/aging.205528 (PMC10911373; doi:10.18632/aging.205528)
Supplement: Supplementary Figure 1 [file aging-16-205528-s001.pdf]

## SUPPLEMENTARY FIGURE

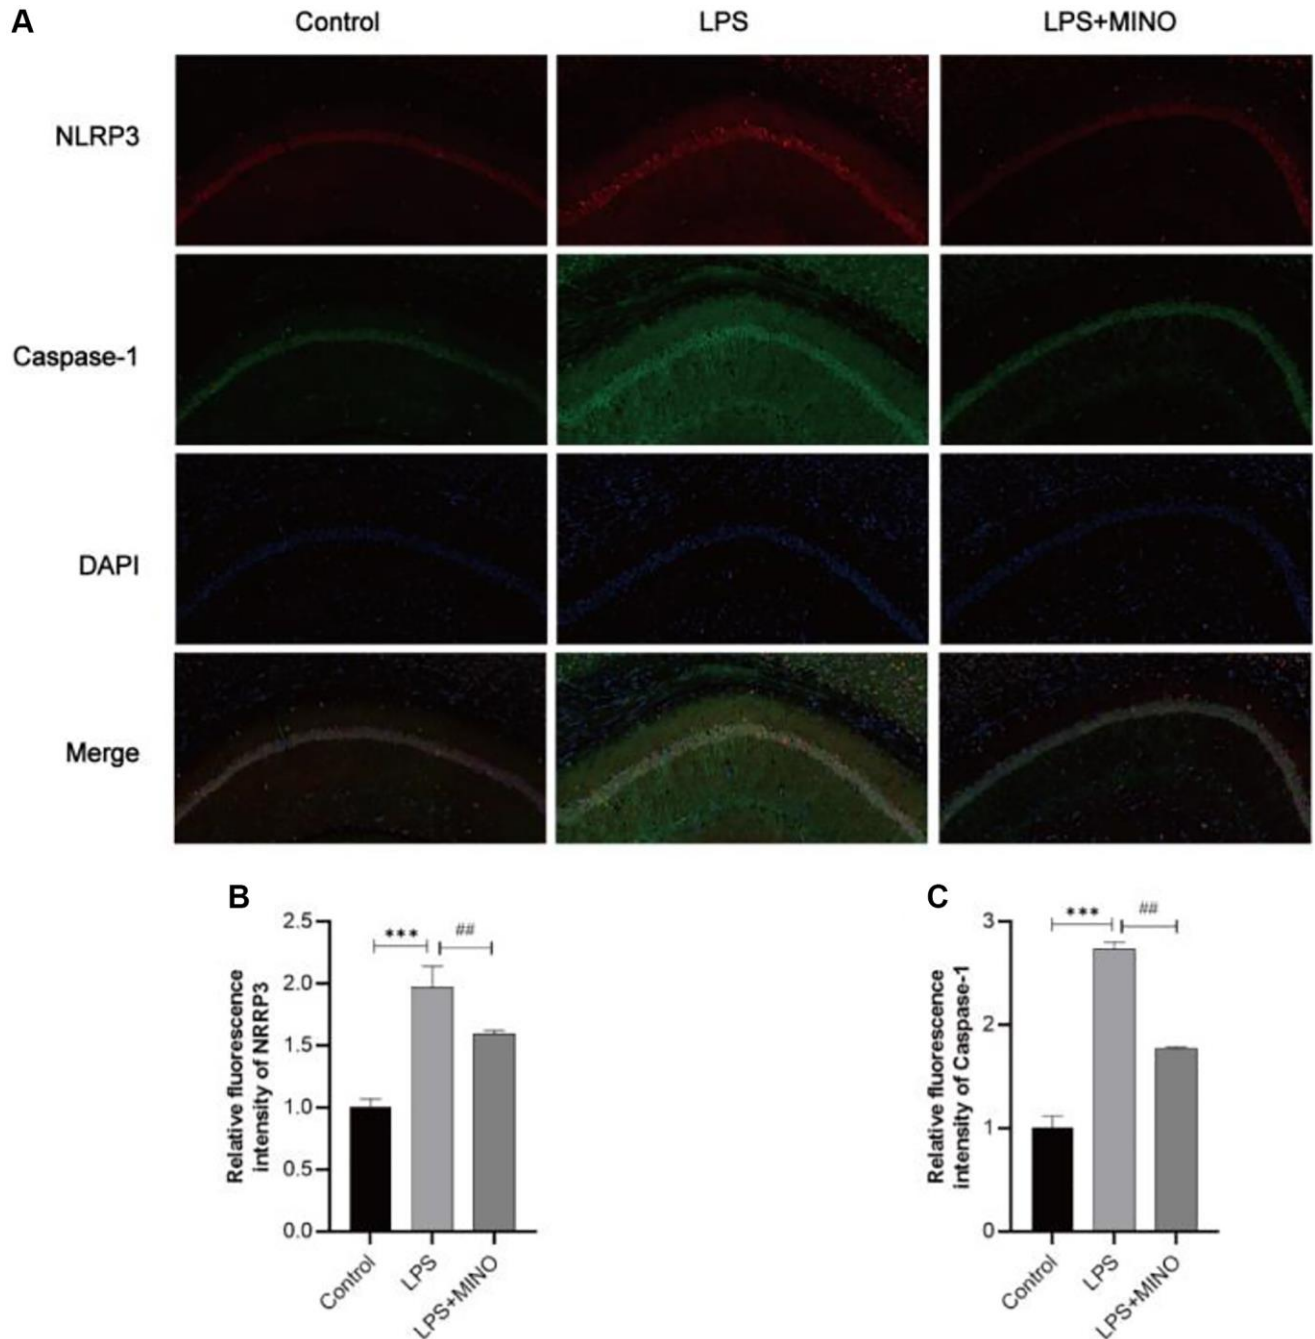

**Supplementary Figure 1. Minocycline inhibited LPS-induced microglial activation in the mice hippocampus.** (A) An immunofluorescence staining assay was performed to detect the expression level of NLRP3 and Caspase-1 in the mice hippocampus, and (B, C) their statistical graphs. Data were presented as mean  $\pm$  SD;  $n = 5-6$  mice per group. \* $P < 0.05$ , \*\* $P < 0.01$ , \*\*\* $P < 0.001$  vs. Control group; # $P < 0.05$ , ## $P < 0.01$ , ### $P < 0.001$  vs. LPS group.
